# Supplementary material for: Potential of epicatechin as antioxidant and antiaging in UV-induced BJ cells by regulating COL1A1, FGF-2, GPX-1, and MMP-1 gene, protein levels, and apoptosis
Source: PeerJ journal article supplement (doi:10.7717/peerj.18382), 2024-11-11
Supplement: Completed_MIQE_Checklist.xls [file Completed_MIQE_Checklist.xls]

## Sheet: Sheet1
ITEM TO CHECK	IMPORTANCE	CHECKLIST	POSITION
EXPERIMENTAL DESIGN
Definition of experimental and control groups	E	v	Line 120
Number within each group	E	v	Line 165
Assay carried out by core lab or investigator's lab?	D	v	Line 306
Acknowledgement of authors' contributions	D	v	Line 311
SAMPLE
Description	E	v	Line 109
Volume/mass of sample processed	D	v	Line 114
Microdissection or macrodissection	E	v	Line 110
Processing procedure	E	v	Line 114
If frozen - how and how quickly?	E	v	Line 142
If fixed - with what, how quickly?	E	v	Line 142
Sample storage conditions and duration (especially for FFPE samples)	E	v	Line 142
NUCLEIC ACID EXTRACTION
Procedure and/or instrumentation	E	v	Line 125
Name of kit and details of any modifications	E	v	Line 126
Source of additional reagents used	D	v	Line 125
Details of DNase or RNAse treatment	E	v	Line 126
Contamination assessment (DNA or RNA)	E	v	Line 128
Nucleic acid quantification	E	v	in suplementary table
Instrument and method	E	v	Line 128
Purity (A260/A280)	D	v	Line 128
Yield	D	v	Line 127
RNA integrity method/instrument	E	v	Line 131
RIN/RQI or Cq of 3' and 5' transcripts	E	v	in suplementary table
Electrophoresis traces	D	v	in raw data
Inhibition testing (Cq dilutions, spike or other)	E	v	Line 131
REVERSE TRANSCRIPTION		v	v
Complete reaction conditions	E	v	Line 133
Amount of RNA and reaction volume	E	v	Line 132
Priming oligonucleotide (if using GSP) and concentration	E	v	Line 130
Reverse transcriptase and concentration	E	v	in suplementary table
Temperature and time	E	v	Line 130
Manufacturer of reagents and catalogue numbers	D	v	Line 129
Cqs with and without RT	D*	not applicable
Storage conditions of cDNA	D	v	Line 142
qPCR TARGET INFORMATION		v	v
If multiplex, efficiency and LOD of each assay.	E	v	in excel data mentah
Sequence accession number	E	v	in suplementary table
Location of amplicon	D	v	in suplementary table
Amplicon length	E	v	in suplementary table
In silico specificity screen (BLAST, etc)	E	v	in suplementary table
Pseudogenes, retropseudogenes or other homologs?	D	not applicable
Sequence alignment	D	not applicable
Secondary structure analysis of amplicon	D	not applicable
Location of each primer by exon or intron (if applicable)	E	not applicable
What splice variants are targeted?	E	not applicable
qPCR OLIGONUCLEOTIDES
Primer sequences	E	v	in suplementary table
RTPrimerDB Identification Number	D	v	in suplementary table
Probe sequences	D**	not applicable
Location and identity of any modifications	E	not applicable
Manufacturer of oligonucleotides	D	not applicable
Purification method	D	not applicable
qPCR PROTOCOL		v	v
Complete reaction conditions	E	v	Line 137
Reaction volume and amount of cDNA/DNA	E	v	Line 135
Primer, (probe), Mg++ and dNTP concentrations	E	v	Line 135
Polymerase identity and concentration	E	v	Line 135
Buffer/kit identity and manufacturer	E	v	Line 135
Exact chemical constitution of the buffer	D	not applicable
Additives (SYBR Green I, DMSO, etc.)	E	v	Line 135
Manufacturer of plates/tubes and catalog number	D	v	Line 136
Complete thermocycling parameters	E	v	Line 140
Reaction setup (manual/robotic)	D	v	line 137
Manufacturer of qPCR instrument	E	v	;line 134
qPCR VALIDATION		v	v
Evidence of optimisation (from gradients)	D	v	in suplementary table
Specificity (gel, sequence, melt, or digest)	E	v	in suplementary table
For SYBR Green I, Cq of the NTC	E	v	Line 135
Standard curves with slope and y-intercept	E	not applicable
PCR efficiency calculated from slope	E	not applicable
Confidence interval for PCR efficiency or standard error	D	not applicable
r2 of standard curve	E	not applicable
Linear dynamic range	E	not applicable
Cq variation at lower limit	E	not applicable
Confidence intervals throughout range	D	not applicable
Evidence for limit of detection	E	not applicable
If multiplex, efficiency and LOD of each assay.	E	not applicable
DATA ANALYSIS		v	v
qPCR analysis program (source, version)	E	v	Line 161
Cq method determination	E	v	Line 141
Outlier identification and disposition	E	not applicable
Results of NTCs	E	not applicable
Justification of number and choice of reference genes	E	not applicable
Description of normalisation method	E	not applicable
Number and concordance of biological replicates	D	v	Line 165
Number and stage (RT or qPCR) of technical replicates	E	v	in raw data
Repeatability (intra-assay variation)	E	not applicable
Reproducibility (inter-assay variation, %CV)	D	not applicable
Power analysis	D	not applicable
Statistical methods for result significance	E	v	Line 161
Software (source, version)	E	v	Line 161
Cq or raw data submission using RDML	D	v	in raw data
Table 1. MIQE checklist for authors, reviewers and editors. All essential information (E) must be submitted with the manuscript. Desirable
information (D) should be submitted if available. If using primers obtained from RTPrimerDB, information on qPCR target, oligonucleotides,
protocols and validation is available from that source.
*: Assessing the absence of DNA using a no RT assay is essential when first extracting RNA. Once the sample has been validated as
RDNA-free, inclusion of a no-RT control is desirable, but no longer essential.
**: Disclosure of the probe sequence is highly desirable and strongly encouraged. However, since not all commercial pre-designed assay
vendors provide this information, it cannot be an essential requirement. Use of such assays is advised against.
