# Supplementary figures and images for: Potential of epicatechin as antioxidant and antiaging in UV-induced BJ cells by regulating COL1A1, FGF-2, GPX-1, and MMP-1 gene, protein levels, and apoptosis
Source: PeerJ journal article supplement (doi:10.7717/peerj.18382), 2024-11-11

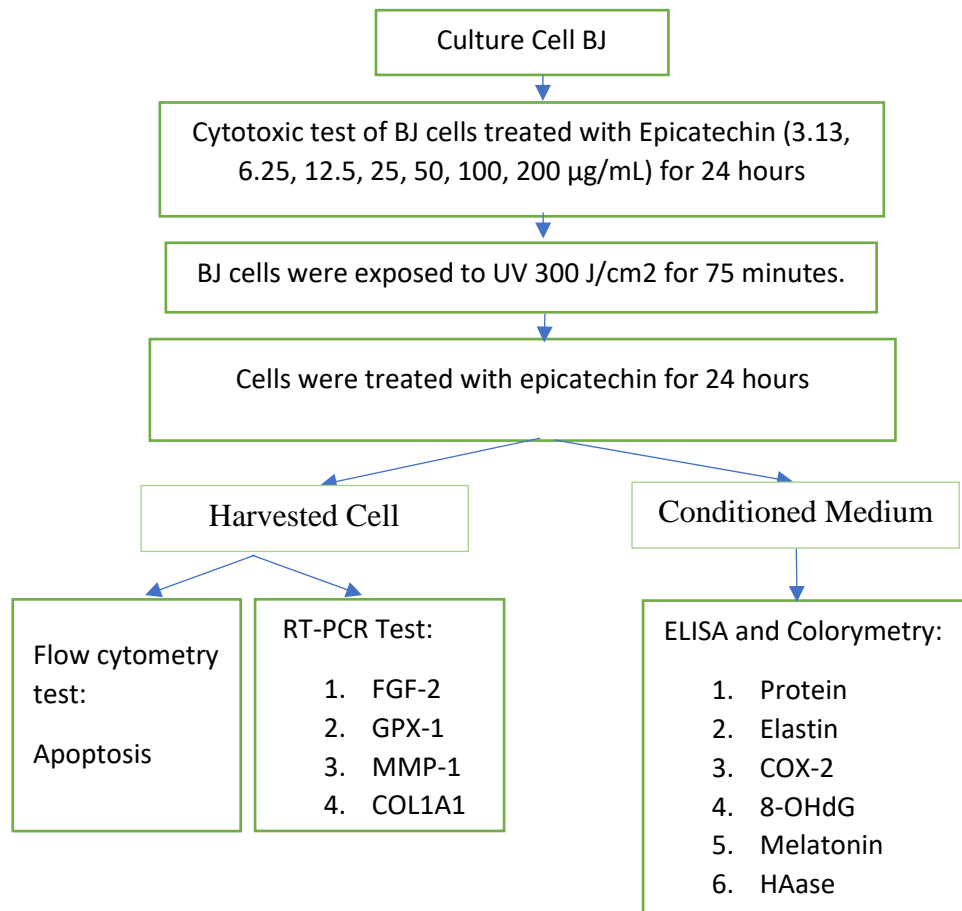

Supplement: Supplementary_1.pdf [file Supplementary_1.pdf]
